# Supplementary material for: Impaired disassembly of the axon initial segment restricts mitochondrial entry into damaged axons
Source: PubMed Central journal article supplement — EMBO J. 2022 Aug 25;41(20):e110486. doi: 10.15252/embj.2021110486 (PMC9574747; doi:10.15252/embj.2021110486), 2022-08-25
Supplement: EMBJ-41-e110486-s005.pdf [file EMBJ-41-e110486-s005.pdf]

# **Mitochondrial entry into damaged axons is restricted by impaired disassembly of the axon initial segment**

Sumiko Kiryu-Seo, Reika Matsushita, Yoshitaka Tashiro, Takeshi Yoshimura, Yohei Iguchi, Masahisa Katsuno, Ryosuke Takahashi, Hiroshi Kiyama

## **Table of contents**

**Appendix Figure S1:** Hypoglossal motor neurons and glial cells of *Atf3*:BAC2 Tg and *Rpt3* CKO mice before and after nerve injury

**Appendix Figure S2:** The expression of GFP and AnkG in spinal motor neurons of *Atf3*:BAC2 Tg and *Rpt3* CKO mice after sciatic nerve injury

**Appendix Figure S3:** The GFP-labeled hypoglossal motor neurons in *Atf3*:BAC;SOD1 mouse

**Appendix Table S1 :** Primer list

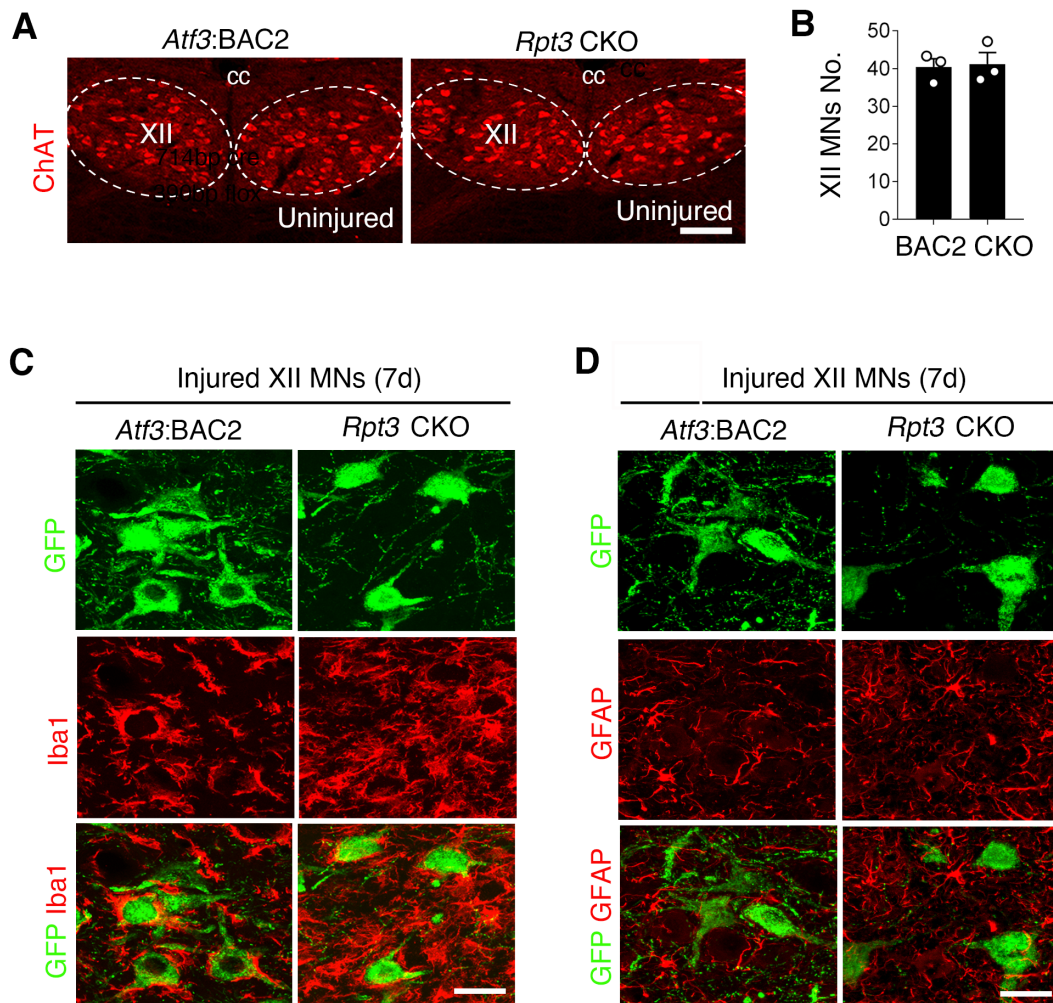

**Appendix Figure S1: Hypoglossal motor neurons and glial cells of *Atf3*:BAC2 Tg and *Rpt3* CKO mice before and after nerve injury.**

- A.** Uninjured hypoglossal nucleus immunostained by anti-ChAT antibody. XII, hypoglossal nucleus; cc, central canal; MNs, motor neurons. Dashed lines outline hypoglossal nucleus
- B.** The graph showing the number of motor neurons in unilateral hypoglossal nucleus per section. Data are shown as the mean  $\pm$  s.e.m. and no significance, determined by Student's *t*-test ( $n=3$  mice per group).
- C.** Injured hypoglossal nucleus at 7 days after injury, immunostained by anti-GFP and -Iba1 antibodies. Microglial cells are more activated around injured hypoglossal motor neurons (MNs) of *Rpt3* CKO mouse.
- D.** Injured hypoglossal nucleus at 7 days after injury, immunostained by anti-GFP and -GFAP antibodies.

Scale bars, 150  $\mu$  m in (A) and 30  $\mu$  m in (C and D).

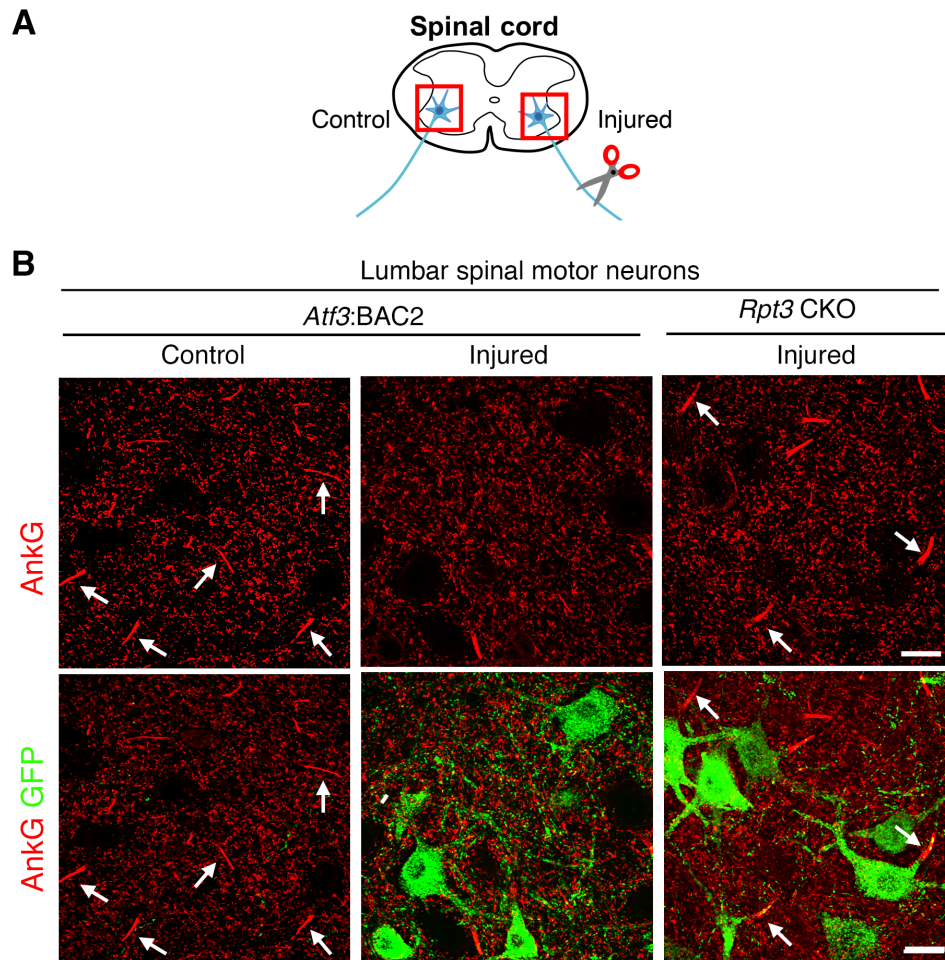

**Appendix Figure S2: The expression of GFP and AnkG in spinal motor neurons of *Atf3*:BAC2 Tg and *Rpt3* CKO mice after sciatic nerve injury.**

**A.** Schematic diagram of sciatic nerve injury model. The area surrounded by red box is observed in (B).

**B.** Spinal motor neurons of *Atf3*:BAC2 Tg and *Rpt3* CKO mice before and at 5 days after injury, immunostained for AnkG and GFP. Arrows indicate the AIS stained by AnkG.

Scale bar, 30  $\mu$  m.

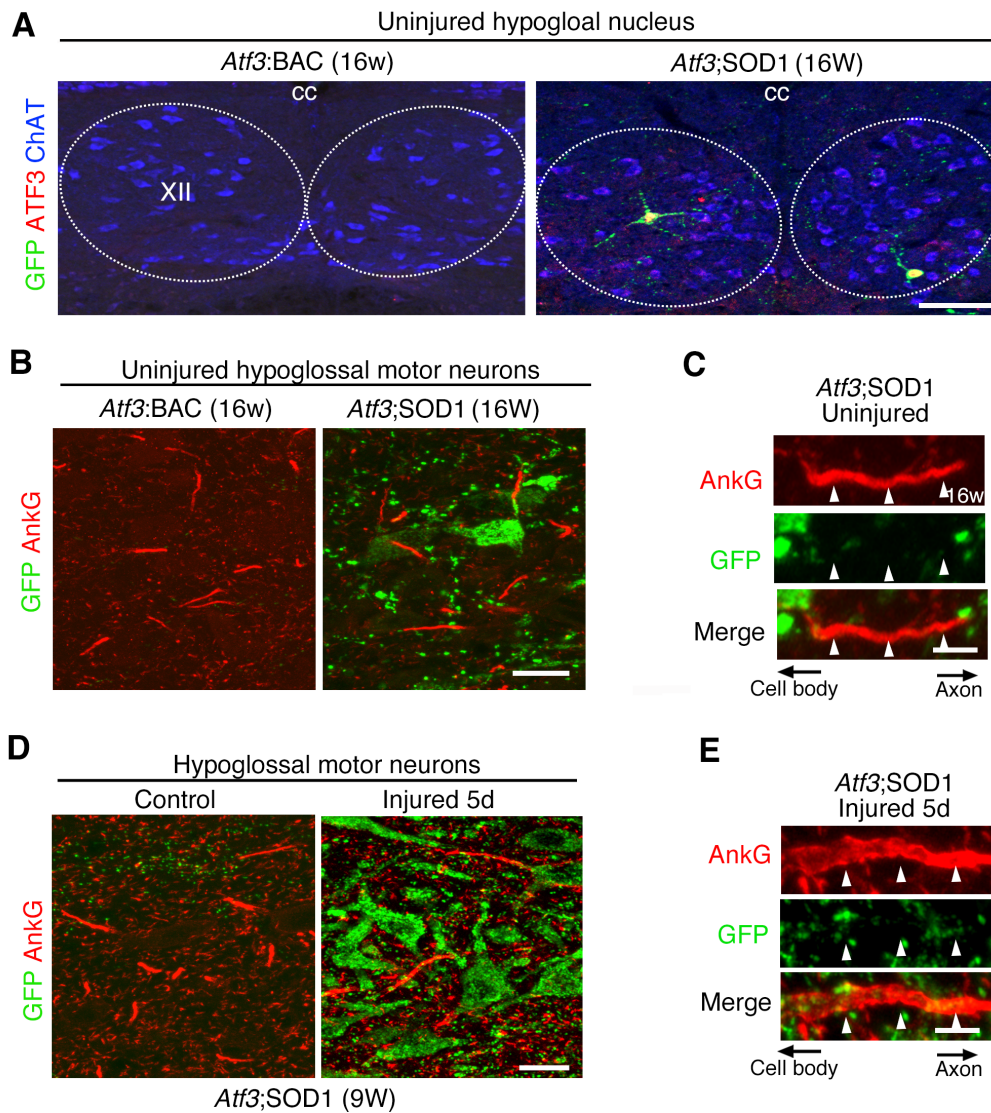

**Appendix Figure S3: The GFP-labeled hypoglossal motor neurons in *Atf3*;SOD1 mouse.**

- A.** Uninjured hypoglossal motor neurons of *Atf3*;SOD1 mouse at 16 weeks old, immunostained by GFP, ATF3 and ChAT. Dashed lines outline hypoglossal nucleus (XII). cc, central canal.
- B.** Uninjured hypoglossal motor neurons of *Atf3*;SOD1 mouse at 16 weeks old, immunostained by AnkG- and GFP- antibodies.
- C.** The localization of the AIS and mitochondria in uninjured GFP-positive motor neurons of *Atf3*;SOD1 mouse at 16 weeks old.
- D.** Hypoglossal motor neurons of *Atf3*;SOD1 mouse (9 weeks old) at 5 days after injury, immunostained by AnkG- and GFP- antibodies.
- E.** The localization of AnkG and GFP-labeled mitochondria in the AIS of uninjured and injured hypoglossal motor neurons of *Atf3*;SOD1 mouse at 9 weeks old. Arrowheads indicate the AIS.
- Scale bars, 100  $\mu$  m in (A), 20  $\mu$  m in (B and D), 5  $\mu$  m in (C and E).

**Appendix Table S1: Primer list**

| <b>Oligonucleotides</b>   |                                |
|---------------------------|--------------------------------|
| Sprr1a-S                  | TTGTGCCCCCAAACCAAG             |
| Sprr1a-A                  | GGCTCTGGTGCCTTAGGTTG           |
| Atf3-S                    | ATGTCAGTCACCAAGTCTGAGGC        |
| Atf3-A                    | TGGATAAAGAGGTTCTCTCGTCTTCC     |
| Gadd45a-S                 | CTGCTGCTACTGGAGAACGAC          |
| Gadd45a-A                 | CGACTTTCCCGGCAAAAACAAA         |
| Cd44-S                    | CACCATTGCCTCAACTGTGC           |
| Cd44-A                    | TTGTGGGCTCCTGAGTCTGA           |
| Fos-S                     | CCATGATGTTCTCGGGTTTC           |
| Fos-A                     | TGTCACCGTGGGGATAAAGT           |
| Gap43-S                   | TGGTGTCAAGCCGGAAGATAA          |
| Gap43-A                   | GCTGGTGCATCACCCCTTCT           |
| Sox11-S                   | CGACGACCTCATGTTTCGACC          |
| Sox11-A                   | GACAGGGATAGGTTCCCCG            |
| Smad1-S                   | GCTTCGTGAAGGGTTGGGG            |
| Smad1-A                   | CGGATGAAATAGGATTGTGGGG         |
| Dine-S                    | GTCTCTGAACTACGGGGGTATTGGCAC    |
| Dine-A                    | GTAGGCCAGCTTGAGGCCTCCCATGTC    |
| Rbfox3-S                  | ATCGTAGAGGGACGGAAAATTGA        |
| Rbfox3-A                  | GTTCCCAGGCTTCTTATTGGTC         |
| Gapdh-S                   | GGTGAAGGTCGGTGTGAACG           |
| Gapdh-A                   | CGTGAGTGGAGTCATACTGGA          |
| Pan AnkG-S                | CTAGAGTCCCCAGCGCAAGCTCG        |
| Pan AnkG-A                | GCCTTTGCTTCTGGAATGACTTCCG      |
| Giant AnkG-S              | CGAGTTCACATCTAAGACACCA         |
| Giant AnkG-A              | TCACGATCTGTTTCCTTCTCC          |
| Chat-S                    | GACCAGCTAAGGTTTGCAGC           |
| Chat-A                    | CAGGAAGCCGGTATGATGAGA          |
| <b>Genotyping primers</b> |                                |
| primer (1)                | CAATAAGATGGAGTACAACACTACAACGC  |
| primer (2)                | GACTCTTTCCACAACACTATCCAACCTCAC |
| primer (3)                | TGAGCTGTGTATCAAGGTCC           |
| primer (4)                | TAGAAGCTGCCTAAGGCACA           |
| primer (5)                | TGCAATCCCTTGTGAGGAGA           |
